# Supplementary material for: Forest roads act as habitat corridors for Populus tremuloides in the boreal forest of eastern Canada
Source: Frontiers journal article supplement (doi:10.3389/fevo.2023.1336409), 2024-01-12
Supplement: Data_Sheet_1.docx [file Data_Sheet_1.docx]

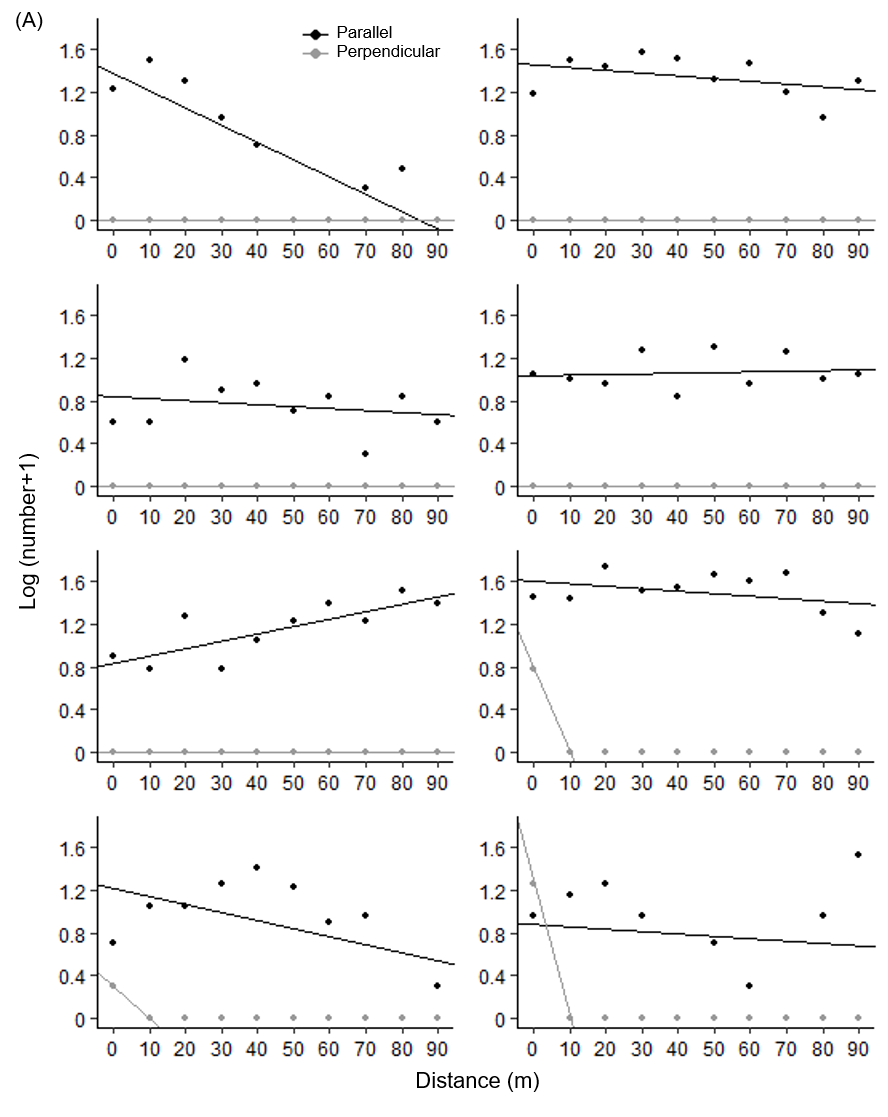


**Supplementary Figure 1.** Relationships between the number of trembling aspen stems and the distance to the centre of the stands for transects parallel (in black) and perpendicular (in grey) to the forest roads. The number of trembling aspen stems was transformed using a logarithmic function. Panels (A) and (B) show stands where forest roads act as a habitat corridor for trembling aspen. Panel (C) shows stands where forest roads play no particular role in the distribution of trembling aspen. Panel (D) shows a stand where the forest road appears to act as a dispersal corridor for trembling aspen. Figure continued on the next page.


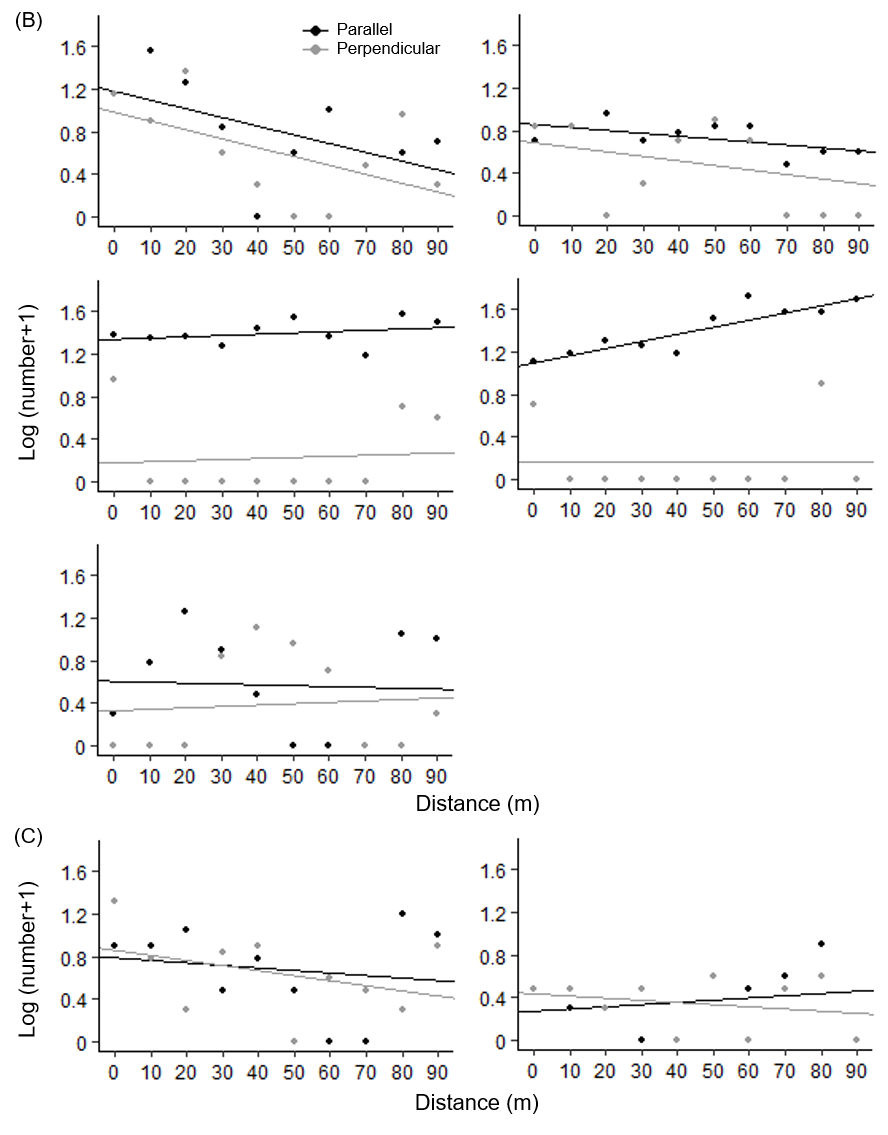


**Supplementary Figure 1 (continued).** Figure continued on the next page.


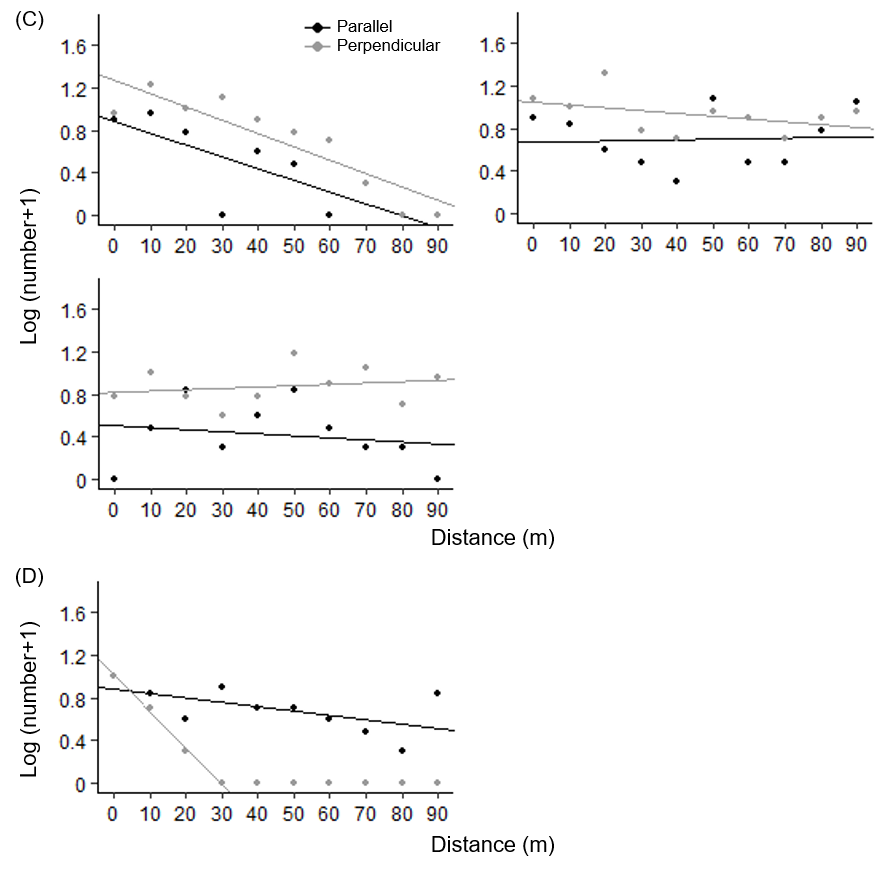


**Supplementary Figure 1 (continued).**
